# Supplementary material for: Effect of tea saponin on ephyrae and polyps of the moon jellyfish Aurelia sp.1
Source: PLoS One. 2017 Aug 4;12(8):e0182787. doi: 10.1371/journal.pone.0182787 (PMC5544227; doi:10.1371/journal.pone.0182787)
Supplement: S1 File — The test results of Aurelia sp.1 ephyrae and polyps exposed to different concentrations of tea saponin are shown in each sheet. (XLSX) [file pone.0182787.s001.xlsx]

## Sheet: Figure 1
Concentrations of tea saponin (mg L-1)	Percentage of immobility % (24h)	SD	Percentage of immobility % (48h)	SD
0	0	0	0	0
0.1	0	0	0	0
0.5	0	0	0	0
1	0	0	0	0
2	8.33333	14.4338	58.3333	7.21688
3	45.8333	28.8675	100	0
4	70.8333	7.21688	100	0
5	100	0	100	0
10	100	0	100	0
50	100	0	100	0

## Sheet: Figure 2
Concentrations of tea saponin (mg L-1)	Percentage of immobility % (24h)	SD	Percentage of immobility % (48h)	SD
0	0	0	0	0
0.1	0	0	0	0
0.5	4.16667	7.21688	4.16667	7.21688
1	95.8333	7.21688	95.8333	7.21688
2	100	0	100	0
3	100	0	100	0
4	100	0	100	0
5	100	0	100	0
10	100	0	100	0
50	100	0	100	0

## Sheet: Figure 3
Concentrations of tea saponin (mg L-1)	Frequency of pulsation (puls/min; 24h)	SD	Frequency of pulsation (puls/min; 48h)	SD
0	65.0179	8.12251	42.5463	7.22918
0.1	55.8452	8.87332	47.629	6.58147											4																		5
0.5	62.6667	12.5487	42.4028	2.24858											1	1	1	2	2	2	3	3	3	4	4	4	5	5	5	6	6	6	1	1	1	2	2	2	3	3	3	4	4	4	5	5	5	6	6
1	49.9306	5.24178	40.2361	4.05353
2	31.6528	0.795313	15.5	4.94624
3	9.80556	11.5473	0	0
4	11.2361	0.632364	0	0
5	0	0	0	0
10	0	0	0	0
50	0	0	0	0
[truncated: 28 more columns]

## Sheet: Figure 4
Concentrations of tea saponin (mg L-1)	Percentage of unhealthy polyps % (24h)	SD	Percentage of unhealthy polyps % (48h)	SD
0	0	0	0	0
0.1	4.16667	7.21688	8.33333	7.21688
0.5	62.5	21.6506	66.6667	19.0941
1	100	0	100	0
2	100	0	100	0
3	100	0	100	0
4	100	0	100	0
5	100	0	100	0
10	100	0	100	0
50	100	0	100	0
